# Supplementary figures and images for: Carboxylic acid-stabilised iron oxide nanoparticles for use in magnetic hyperthermia
Source: Royal Society of Chemistry journal article supplement (doi:10.1039/b908187a), 2009-01-01

Supplementary Information

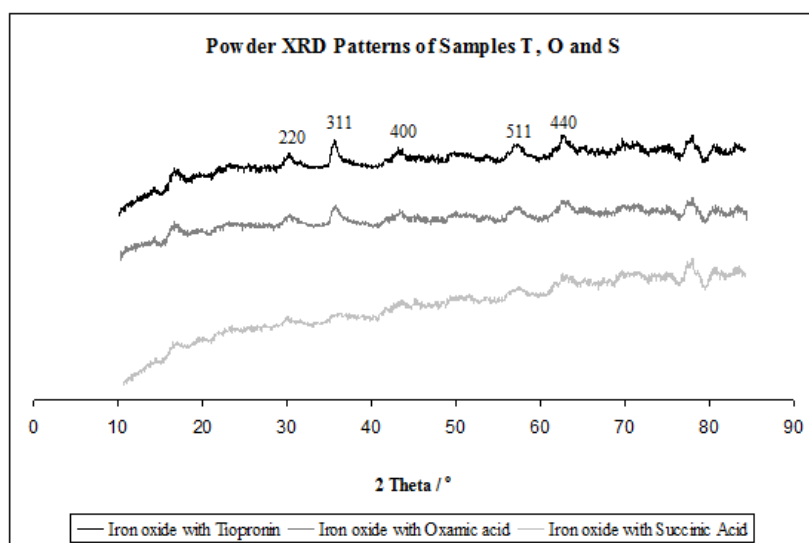

Fig. S1

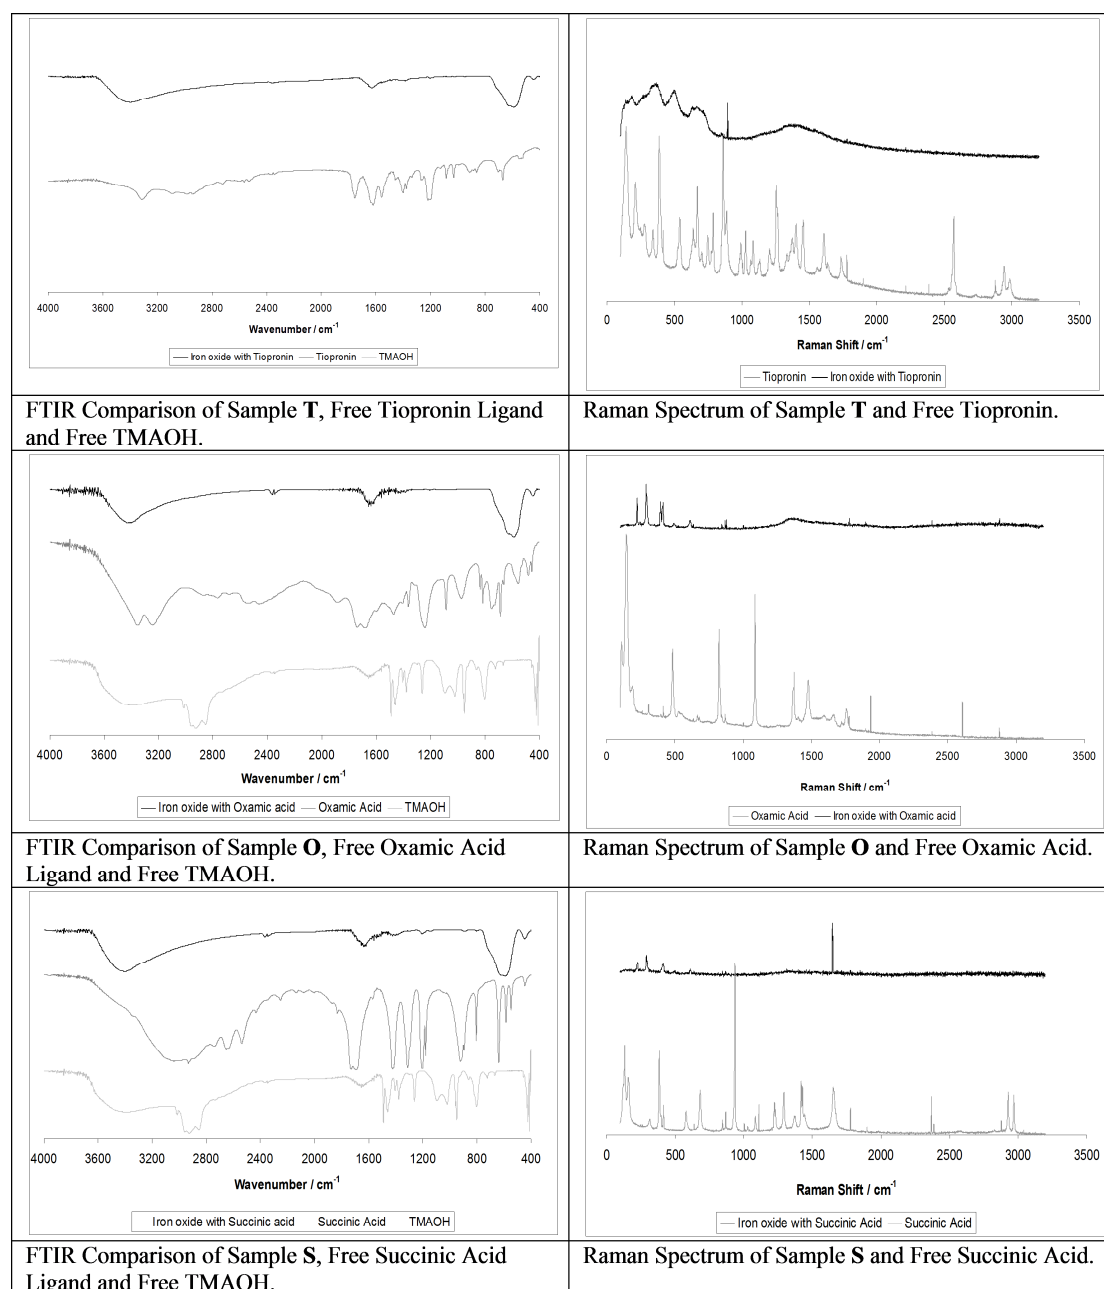

Fig. S2

Supplement: b908187a.pdf [file b908187a.pdf]
